# Supplementary material for: Research on Royal Jelly Impurity Detection Based on the CARCAW-YOLOv11 Algorithm
Source: Research Square preprint supplement (doi:10.21203/rs.3.rs-8656056/v1), 2026-02-02
Supplement: Supplementary file 1 [file 5f78336697e10190572fae39.docx]

**Highlights**

1. A RJ TWO dataset containing beeswax and bee pupae images was constructed.
2. Proposed module named CARCAW-YOLOv11 integrating CARAFE, CA, and Wise-IoU.
3. CARAFE and CA integration improved feature reconstruction and object localization.
4. The model reached 91.7% precision, 87.3% mAP@0.5, and 140.2 FPS speed.
5. It enabled automated, standardized, and efficient royal jelly quality control.
