# Supplementary material for: Research on Royal Jelly Impurity Detection Based on the CARCAW-YOLOv11 Algorithm
Source: Research Square preprint supplement (doi:10.21203/rs.3.rs-8656056/v1), 2026-02-02
Supplement: Supplementary file 1 [file 4304d1f1361344e9c9cd8587.pdf]

# Input

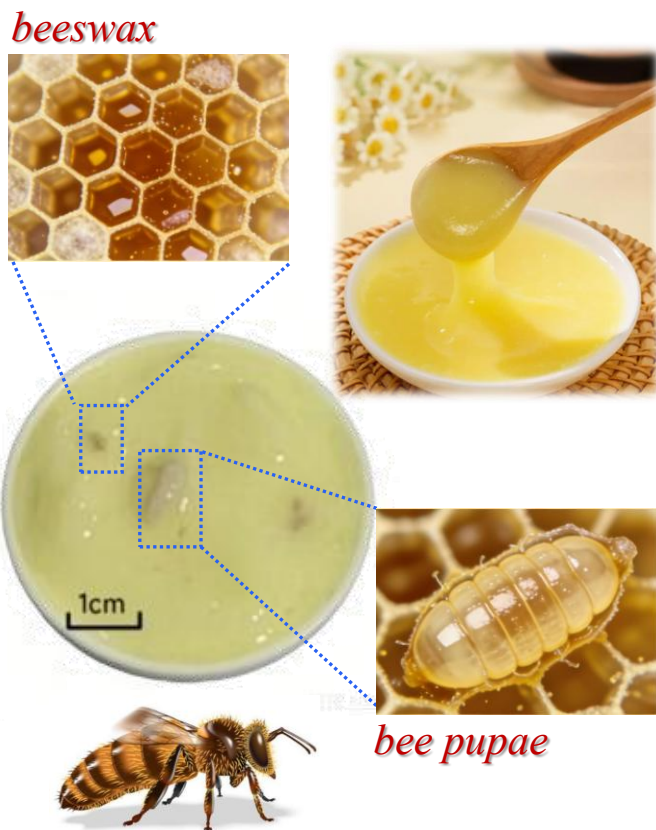

# CARCAW-YOLOv11

Reduced information loss

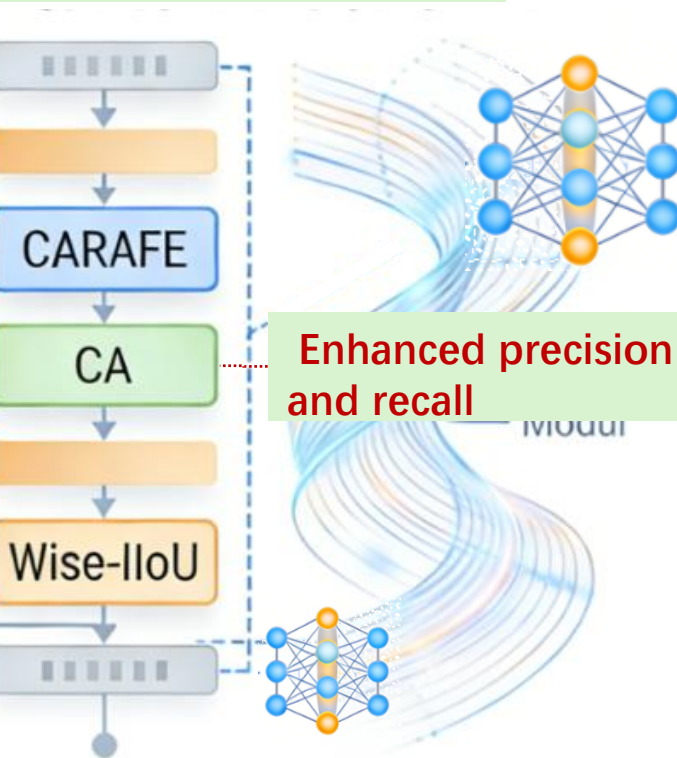

Enhanced precision and recall

Reduced computational complexity

# Output

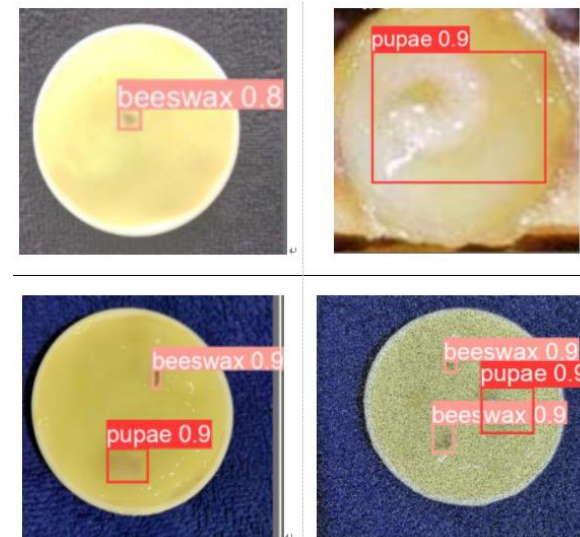

|           |       |
|-----------|-------|
| Precision | 91.7% |
| Recall    | 80.5% |
| mAP@0.5   | 87.3% |
| F1-score  | 0.79  |

## Royal Jelly Impurity Detection
